# Supplementary material for: Questionnaire development and validity to measure sexual intention among youth in Malaysia
Source: Springer Nature journal article supplement (doi:10.1186/s12889-016-3949-1), 2017-02-02
Supplement: MOESM1 [file 12038194]

## Supplementary 1

### YOUTH SEXUAL INTENTION QUESTIONNAIRE (YSI-Q)

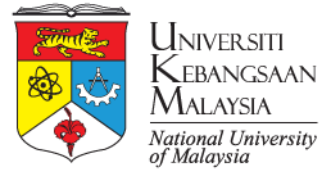

#### **Authors:**

Noor Azimah Muhammad, Khadijah Shamsuddin, Rahmah Mohd. Amin and Khairani Omar

### INTRODUCTION

The Youth Sexual Intention Questionnaire (YSI-Q) is a 20 item self-administered questionnaire and was constructed based on the Theory of Planned Behaviour. It is designed to measure current sexual intention of both male and female unmarried youths. YSI-Q is scored based on the responses on a 4-point Likert scale from 1 (strongly disagree) to 4 (strongly agree). A higher total score of item 1 to 5 indicates a higher intention to have sex, a higher total score of item 6 to 10 indicates a higher permissive attitude towards premarital sex, a higher total score of item 11 to 16 indicates a higher perception of social norms on premarital sex and a higher total score of item 17 to 20 indicates a higher perception of self-efficacy on performing sexual activity. The Malay version of the YSI-Q is available upon request.

## YOUTH SEXUAL INTENTION QUESTIONNAIRE (YSI-Q)

The following statements are about sexual activities among unmarried youths. Please read each statement carefully and circle a number 1, 2, 3, or 4 which indicates how much you agree or disagree with the statement. There is no right or wrong answer. Please give your honest response for all the items.

| OPTIONS: | Strongly disagree<br>1                                                                                                | Disagree<br>2 | Agree<br>3 | Strongly agree<br>4 |
|----------|-----------------------------------------------------------------------------------------------------------------------|---------------|------------|---------------------|
| 1.       | I expect to have sex with my partner                                                                                  |               |            | 1 2 3 4             |
| 2.       | I want to have sex with my partner                                                                                    |               |            | 1 2 3 4             |
| 3.       | I intend to have sex with my partner                                                                                  |               |            | 1 2 3 4             |
| 4.       | I would like to have sex to see what it is like.                                                                      |               |            | 1 2 3 4             |
| 5.       | I would have sex now if I could find a partner who would do it with me                                                |               |            | 1 2 3 4             |
| 6.       | I believe a sexual encounter that lasts only once is all right.                                                       |               |            | 1 2 3 4             |
| 7.       | I believe youths who have never been involved in sexual intercourse before marriage are old-fashioned.                |               |            | 1 2 3 4             |
| 8.       | Youths should have sex before their marriage to see whether they are suited to each other.                            |               |            | 1 2 3 4             |
| 9.       | Youths can have sex provided they use methods to stop pregnancy.                                                      |               |            | 1 2 3 4             |
| 10.      | Youths can have sex if they are unable to control their sexual desire.                                                |               |            | 1 2 3 4             |
| 11.      | Most of my friends are practicing sex before marriage.                                                                |               |            | 1 2 3 4             |
| 12.      | Most of my friends think it is mature to practice sex at my age.                                                      |               |            | 1 2 3 4             |
| 13.      | Most of my friends think female youths do not have to maintain their virginity.                                       |               |            | 1 2 3 4             |
| 14.      | Most of my friends think male youths are allowed to practice sex before marriage.                                     |               |            | 1 2 3 4             |
| 15.      | Most of my friends think that you can have sex before marriage if you are in love.                                    |               |            | 1 2 3 4             |
| 16.      | Most of my friends think youths who have never been involved in sexual intercourse before marriage are old-fashioned. |               |            | 1 2 3 4             |
| 17.      | I know when I can have sex.                                                                                           |               |            | 1 2 3 4             |
| 18.      | I know where I can have sex.                                                                                          |               |            | 1 2 3 4             |
| 19.      | I can decide on my sexual activity.                                                                                   |               |            | 1 2 3 4             |
| 20.      | Whether I have sex or not is entirely up to me.                                                                       |               |            | 1 2 3 4             |

***Thank you for your participation***
